# Supplementary material for: Creation of novel alleles of fragrance gene OsBADH2 in rice through CRISPR/Cas9 mediated gene editing
Source: PubMed Central journal article supplement (PMC7423090; doi:10.1371/journal.pone.0237018), 2020-08-12
Supplement: pone.0237018.s008.pdf [file pone.0237018.s008.pdf]

Raw image for Figure 2j

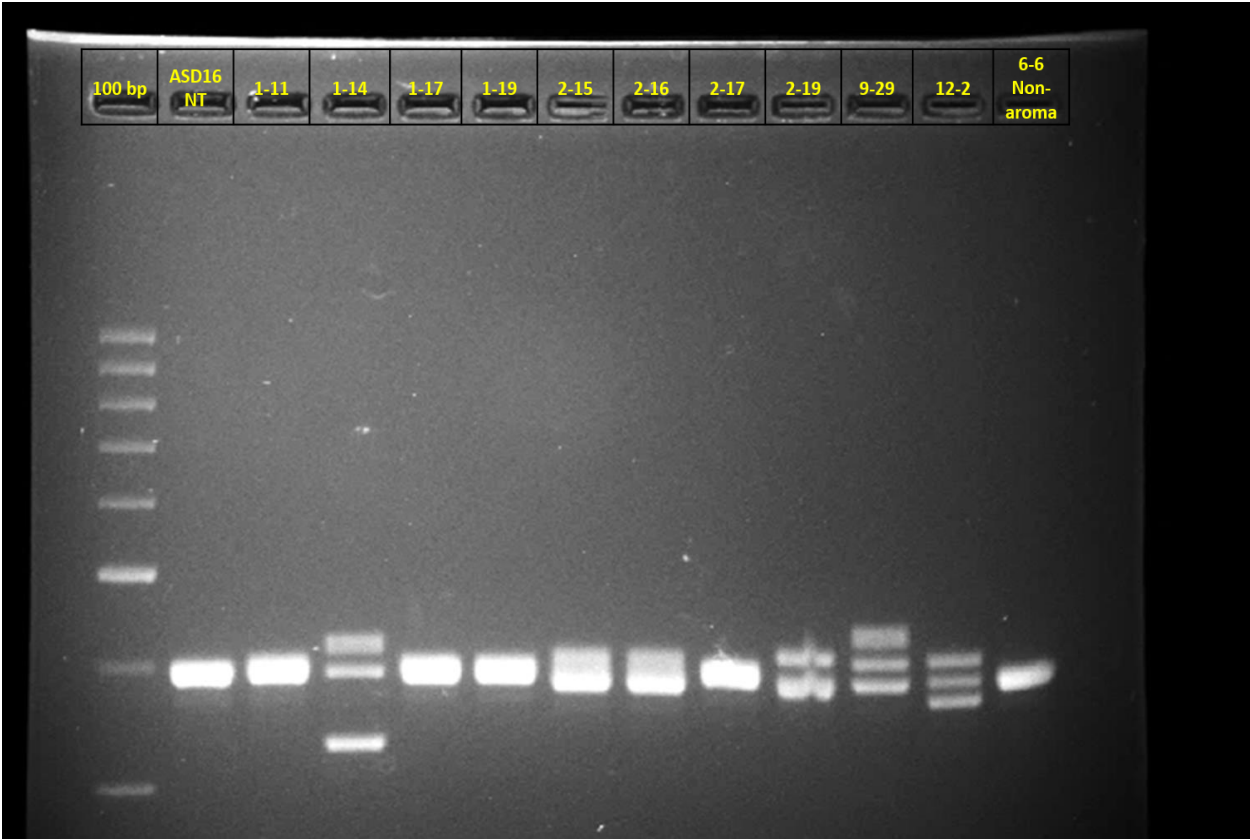

# Raw Image for S2

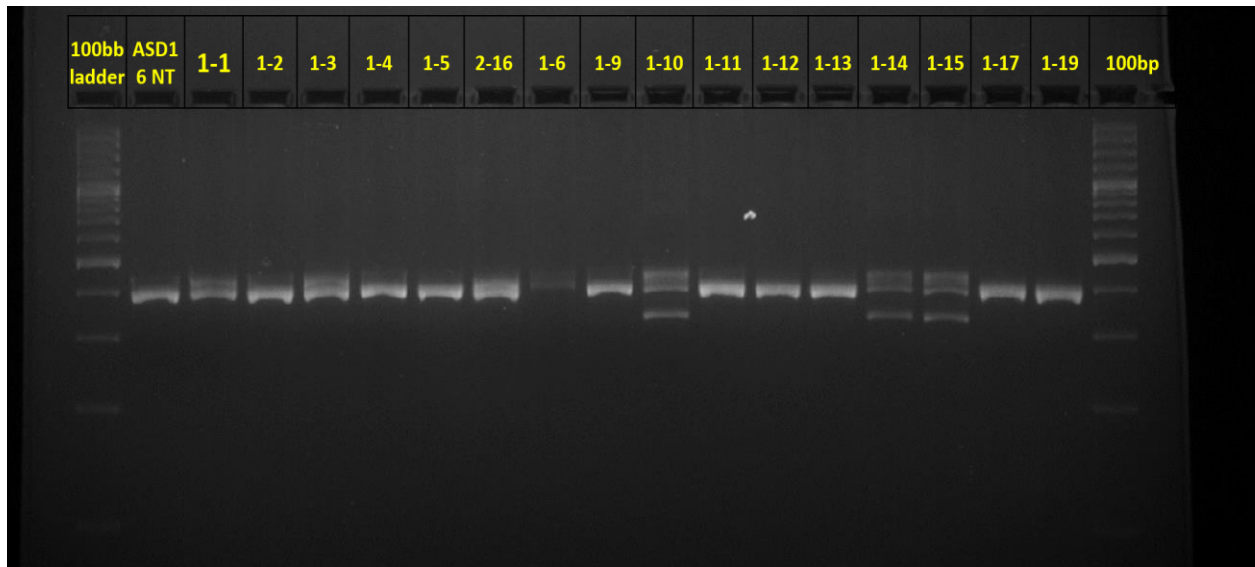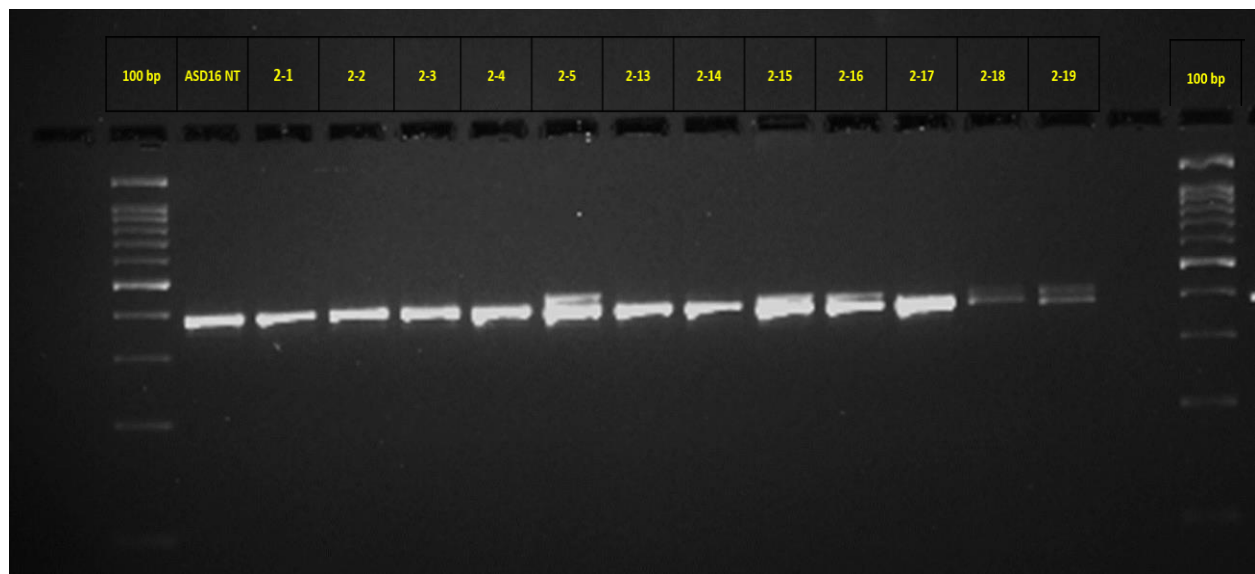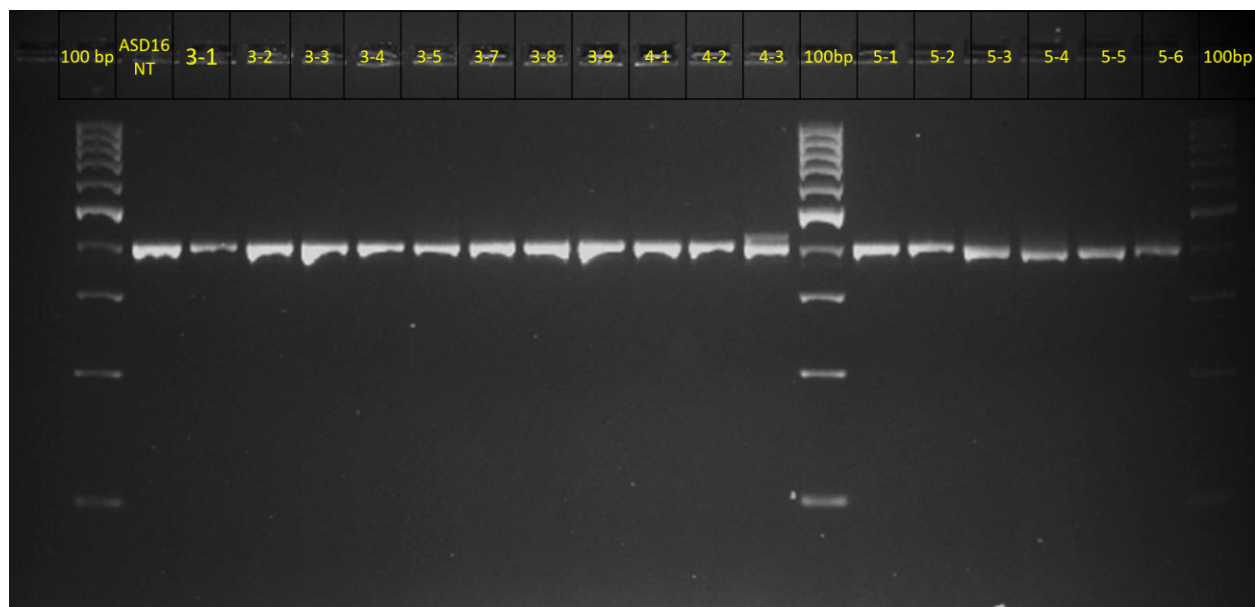

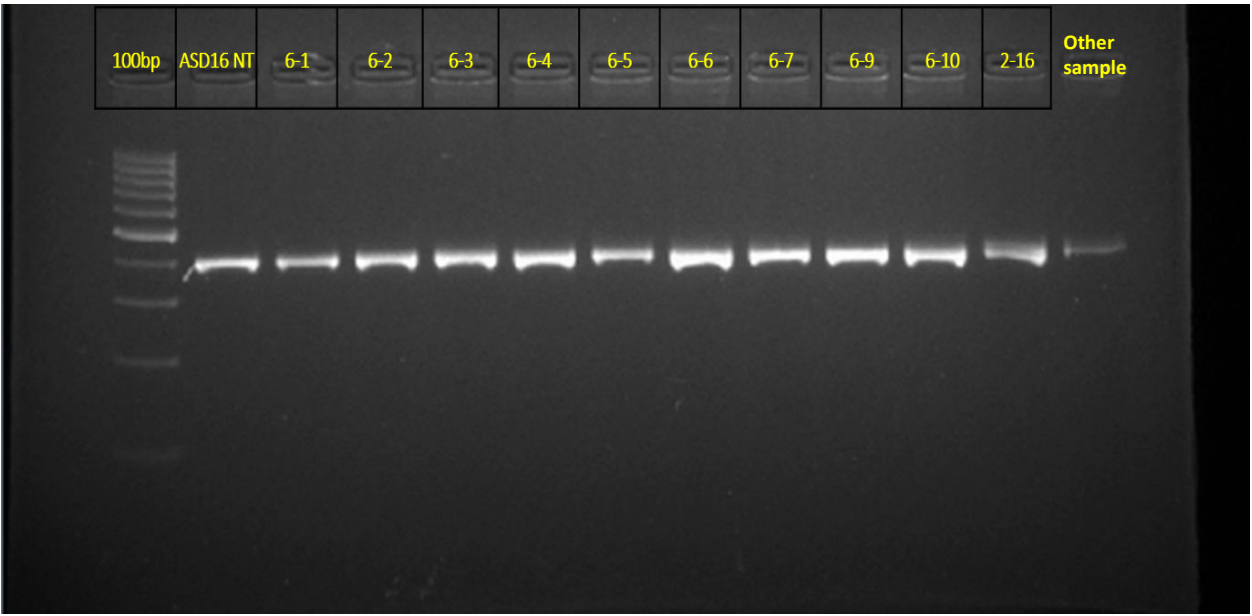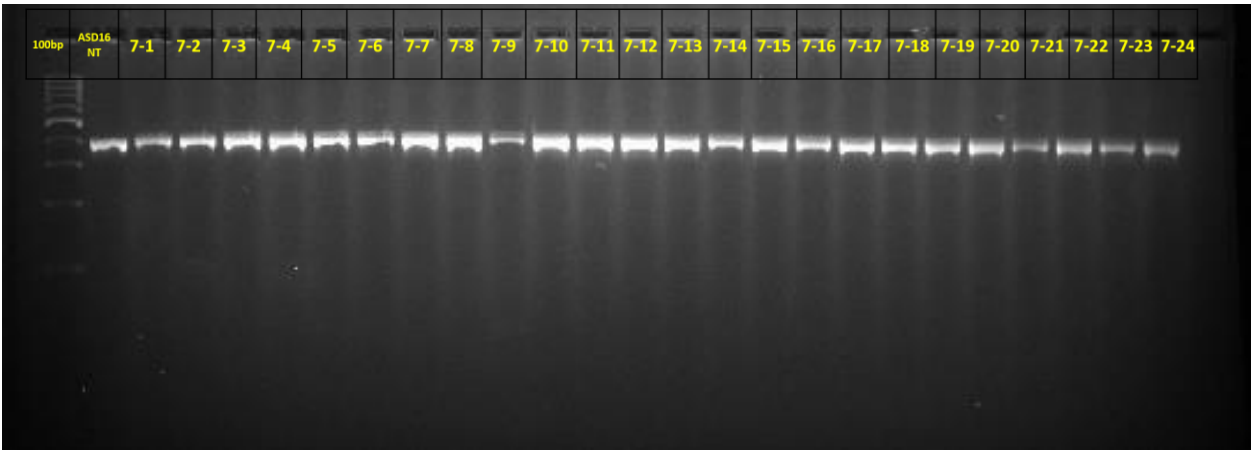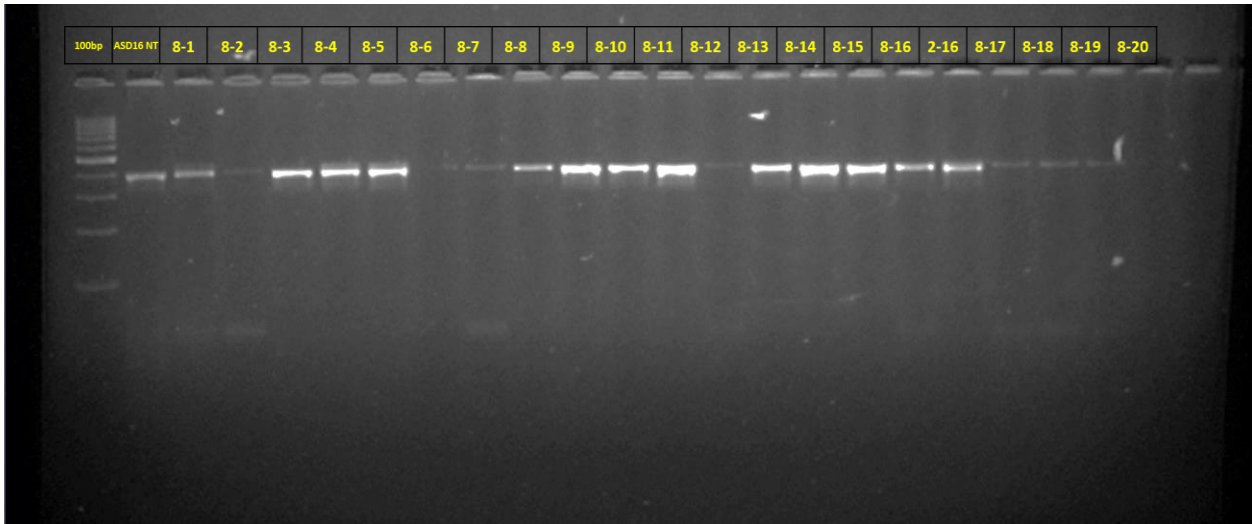

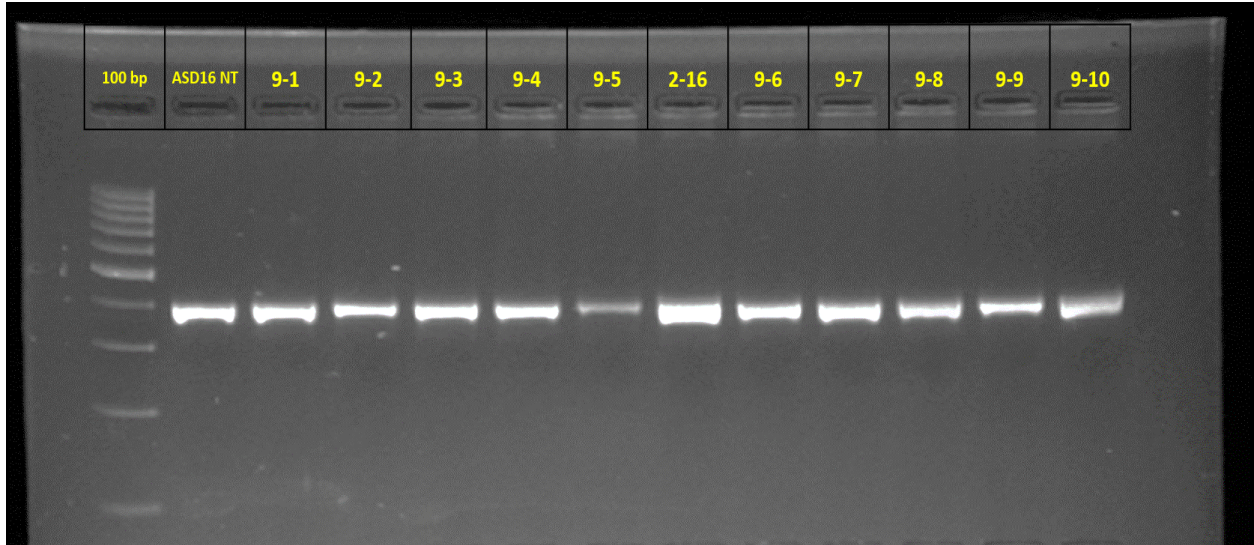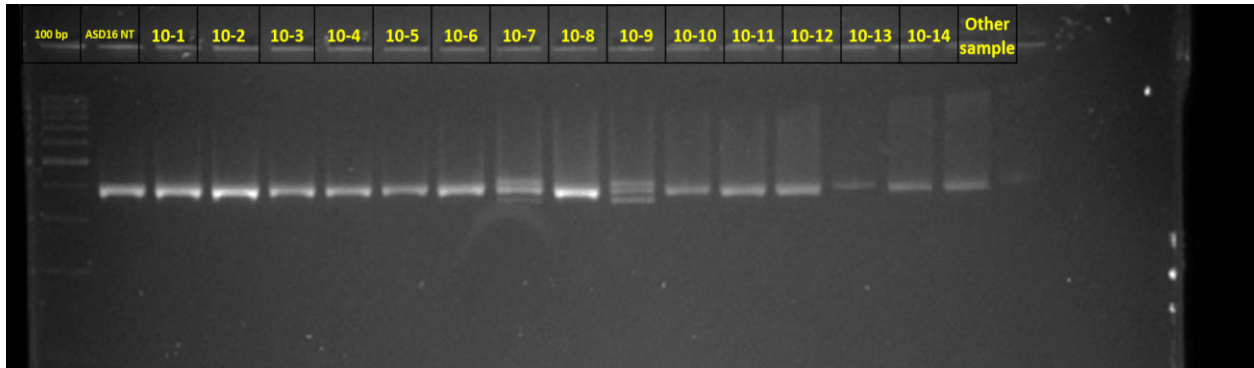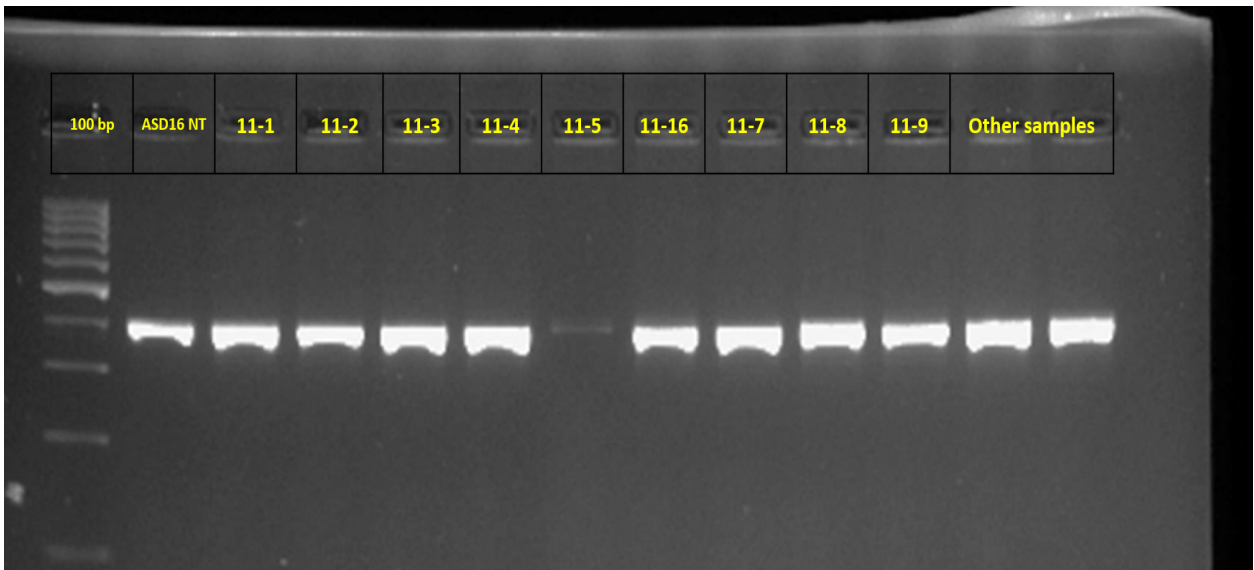



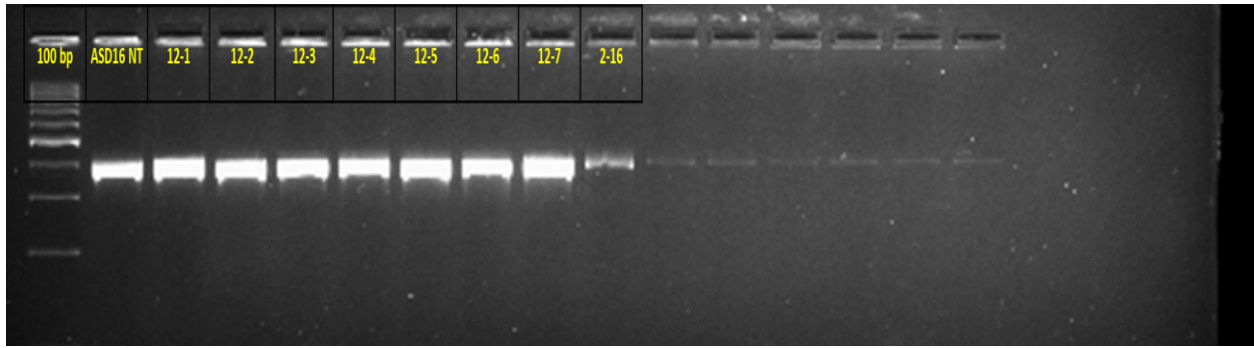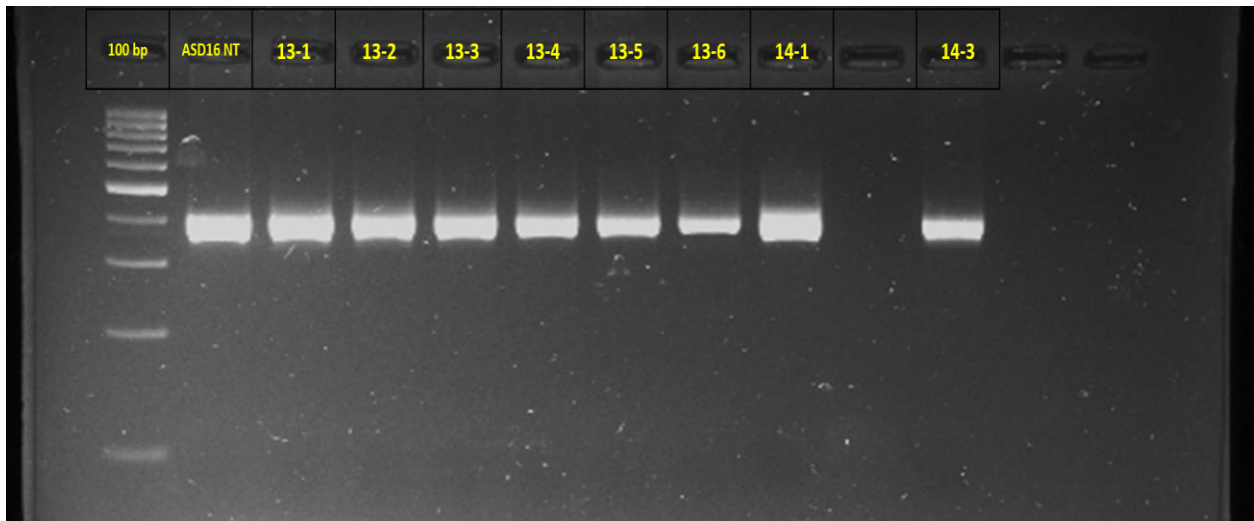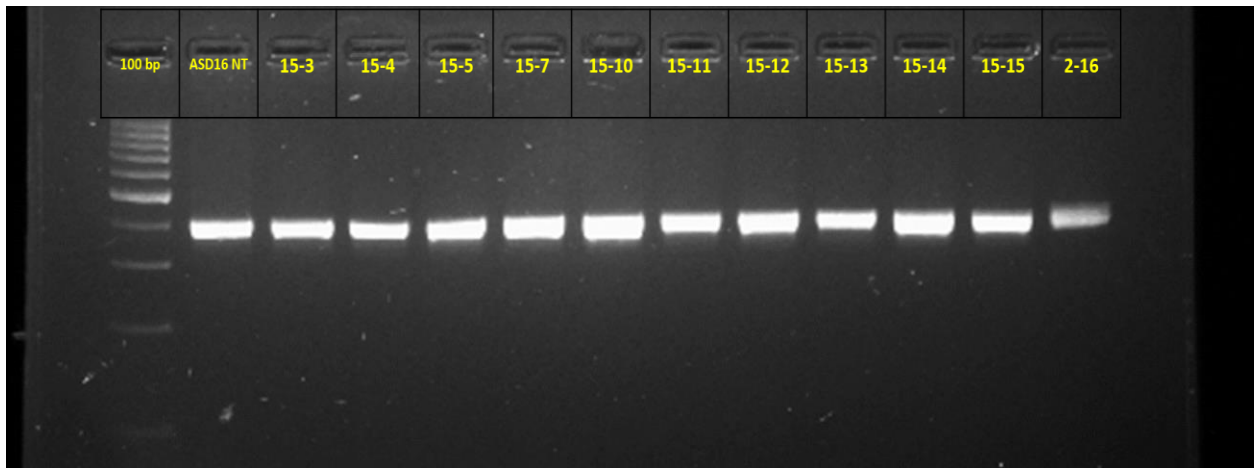

# S6 Raw image

CLUSTAL O(1.2.4) multiple sequence alignment

```
LOC_Os08g32870.1_NF -----ATGCCACGGCGATCCCGCAGCGGCAGCTCTTCGTCGCCGGCGAGTGGCGCGCC 54
LOC_Os08g32870.1_F -----ATGCCACGGCGATCCCGCAGCGGCAGCTCTTCGTCGCCGGCGAGTGGCGCGCC 54
LOC_Os04g39020.1 ATGGCCGCGCCGTCGGCGATCCCCCGCGCGGCTGTTCATCGCGCGCGGGTGGCGGGAG 60
* * * * *

LOC_Os08g32870.1_NF CCCGCGCTCGGCCCGCGCTCCCGTCGTCAACCCCGCCACCGAGTCCCCATCGGCGAG 114
LOC_Os08g32870.1_F CCCGCGCTCGGCCCGCGCTCCCGTCGTCAACCCCGCCACCGAGTCCCCATCGGCGAG 114
LOC_Os04g39020.1 CCGTCCCTCGGCCCGCGCTCCCGTCGTCAACCCCGCCACCGAGGCAACCATCGGTGAC 120
* * * * *

LOC_Os08g32870.1_NF ATCCCGCGGGCACGGCGGAGGACGTGGACGCGCGGCTGGCGGCGCGGGAGGCGCTG 174
LOC_Os08g32870.1_F ATCCCGCGGGCACGGCGGAGGACGTGGACGCGCGGCTGGCGGCGCGGGAGGCGCTG 174
LOC_Os04g39020.1 ATCCCGCGGGCACGGCGGAGGACGTGGAGCTCGGCTGTCGGCGCGGAGGATGCGTTC 180
* * * * *

LOC_Os08g32870.1_NF AAGAGGAACCGGGGCGCGACTGGGCGCGCGCGCGGGCGCGCTCCGGGCCAAGTACCTC 234
LOC_Os08g32870.1_F AAGAGGAACCGGGGCGCGACTGGGCGCGCGCGCGGGCGCGCTCCGGGCCAAGTACCTC 234
LOC_Os04g39020.1 GGCGCGACGGTGGGAGACACTGGTTCGCGCGCGCTGGGGCCGTGCGGGCCAAGTACCTC 240
* * * * *

LOC_Os08g32870.1_NF CGCGCAATCGCGGCCAAGATAATCGAGAGGAAATCTGAGCTGGCTAGACTAGAGACGCTT 294
LOC_Os08g32870.1_F CGCGCAATCGCGGCCAAGATAATCGAGAGGAAATCTGAGCTGGCTAGACTAGAGACGCTT 294
LOC_Os04g39020.1 AAGGCGATCGCCGCTAAGATTAAAGATAAGAAATCTTATCTAGCTTTGTTGGAGACTCTT 300
* * * * *

LOC_Os08g32870.1_NF GATTGTGGGAAGCCTCTTGATGAAGCAGCATGGGACATGGACGATGTTGCTGGATGCTTT 354
LOC_Os08g32870.1_F GATTGTGGGAAGCCTCTTGATGAAGCAGCATGGGACATGGACGATGTTGCTGGATGCTTT 354
LOC_Os04g39020.1 GATTCGGAAGCCTCTTGATGAAGCAGCTGGGACATGGAGGATGTCGCTGCATGCTTT 360
* * * * *

LOC_Os08g32870.1_NF GAGTACTTGCAGATCTTGCAGAATCCTTGGACAAAAGGCAAAATGCACCTGTCTCTCTT 414
LOC_Os08g32870.1_F GAGTACTTGCAGATCTTGCAGAATCCTTGGACAAAAGGCAAAATGCACCTGTCTCTCTT 414
LOC_Os04g39020.1 GAGTATTATGCTGATCTGGCAGAAGCTTTAGATGGGAAACAACGGGCCAACATCTCTCTA 420
* * * * *

LOC_Os08g32870.1_NF CCAATGGAACCTTTAAATGCTATCTTCGAAAGAGCCTATCGGTGTAGTTGGGTTGATC 474
LOC_Os08g32870.1_F CCAATGGAACCTTTAAATGCTATCTTCGAAAGAGCCTATCGGTGTAGTTGGGTTGATC 474
LOC_Os04g39020.1 CCCATGGAACCTTTTGTGCTATGTACTCAAGAACCCTATGGGTTGTTGGACTTATC 480
* * * * *

LOC_Os08g32870.1_NF ACACCTTGAACCTATCCTCTCCTGATGGCAACATGGAAGGTAGCTCCTGCCCTGGCTGCT 534
LOC_Os08g32870.1_F ACACCTTGAACCTATCCTCTCCTGATGGCAACATGGAAGGTAGCTCCTGCCCTGGCTGCT 534
LOC_Os04g39020.1 ACTCCCTGGAATATCCTCTCCTGATGGCTACTTGAAGGTTGCACCTGCCCTGGCTGCT 540
* * * * *

LOC_Os08g32870.1_NF GGCTGTACAGCTGTACTAAAACCATCTGAATTGGCTCCGTGACTTGTGTTGGAGCTTGCT 594
LOC_Os08g32870.1_F GGCTGTACAGCTGTACTAAAACCATCTGAATTGGCTCCGTGACTTGTGTTGGAGCTTGCT 594
LOC_Os04g39020.1 GGGTGTACAGCTGTATTAAGCCATCTGAGCTTGCTCCCTGCATGTTTAGAGCTTGGT 600
* * * * *

LOC_Os08g32870.1_NF GATGTGTGTAAGAGGTTGGTCTTCCTTCAGGTGTGCTAAACATAGTGACTGGATTAGGT 654
LOC_Os08g32870.1_F GATGTGTGTAAGAGGTTGGTCTTCCTTCAGGTGTGCTAAACATAGTGACTGGATTAGGT 654
LOC_Os04g39020.1 GGAATATGTGCAGAAATGGATACCTCCAGGAGTCTGAACATAATACTGGTCTGGGC 660
* * * * *

LOC_Os08g32870.1_NF TCTGAAGCCGGTGTCTCTTTGTCATCACACCCCTGGTGTAGACAAGGTTGCATTTACTGGG 714
LOC_Os08g32870.1_F TCTGAAGCCGGTGTCTCTTTGTCATCACACCCCTGGTGTAGACAAGGTTGCATTTACTGGG 714
LOC_Os04g39020.1 ACTGAAGCTGGTGTCTCCATTAGCTTCACATCCCATGTGGATAAGATTGCTTTTACTGGA 720
* * * * *

LOC_Os08g32870.1_NF AGTTATGAACTGG-----TATGGCTTCAGCTGCTCCTATGGTTAAGCCTGTTTCA 766
LOC_Os08g32870.1_F AGTTATGAACTGGTAAAAGATATGGCTTCAGCTGCTCCTATGGTTAAGCCTGTTTCA 774
LOC_Os04g39020.1 AGCACAGAACTGGTAAGAGGATAATGATTACTGCTCCCAAATGGTCAAGCCTGTTTCG 780
* * * * *
```

LOC\_Os08g32870.1\_NF CTGGAACCTGGTGGAAAAAGTCCTATAGTGGTGTGGATGATGTTGATGTTGAAAAAGCT 825  
 LOC\_Os08g32870.1\_F CTGGAACCTGGTGGAAAAAGTCCTATAGTGGTGTGGATGATGTTGATGTTGAAAAAGCT 834  
 LOC\_Os04g39020.1 TTAGAGCTGGTGGCAAAAAGTCCTTATTGTCTTTGATGATGTTGATATTGATAAAGCT 840  
 \* \* \* \* \*

LOC\_Os08g32870.1\_NF GTTGAGTGGACTCTCTTTGGTTGCTTTTGGACCAATGGCCAGATTTGCAGTGCAACATCG 885  
 LOC\_Os08g32870.1\_F GTTGAGTGGACTCTCTTTGGTTGCTTTTGGACCAATGGCCAGATTTGCAGTGCAACATCG 894  
 LOC\_Os04g39020.1 GTTGAGTGGCCATGTTTGGGTGTTTTGCGAACGCTGGTCAAGTCTGCAGTGCTACTTCT 900  
 \* \* \* \* \*

LOC\_Os08g32870.1\_NF CGTCTTATCTTCATAAAAAAATCGCTAAAGAATTTCAAGAAAGGATGGTTGCATGGGCC 945  
 LOC\_Os08g32870.1\_F CGTCTTATCTTCATAAAAAAATCGCTAAAGAATTTCAAGAAAGGATGGTTGCATGGGCC 954  
 LOC\_Os04g39020.1 CGTCTACTTTTGCATGAGAAAATGCAAGCGATTCTTGGATAGGTTGGTTGCATGGGCA 960  
 \* \* \* \* \*

LOC\_Os08g32870.1\_NF AAAAATATTAAGGTGTCAGATCCACTTGAAGAGGGTTGCAGGCTTGGGCCCGTTGTTAGT 1005  
 LOC\_Os08g32870.1\_F AAAAATATTAAGGTGTCAGATCCACTTGAAGAGGGTTGCAGGCTTGGGCCCGTTGTTAGT 1014  
 LOC\_Os04g39020.1 AAGAGTATCAAAATCTCAGATCCACTAGAAGAAGGTTGCAGGCTGGGGTCAGTCGTTAGT 1020  
 \* \* \* \* \*

LOC\_Os08g32870.1\_NF GAAGGACAGTATGAGAAGATTAAGCAATTTGTATCTACCGCCAAAAGCCAAGGTGCTACC 1065  
 LOC\_Os08g32870.1\_F GAAGGACAGTATGAGAAGATTAAGCAATTTGTATCTACCGCCAAAAGCCAAGGTGCTACC 1074  
 LOC\_Os04g39020.1 GAAGGGCAGTATCAAAAAAATAATGAAGTTCATCTCAACAGCAAGATGTAAGGTGCCACA 1080  
 \* \* \* \* \*

LOC\_Os08g32870.1\_NF ATTCTGACTGGTGGGGTTAGACCAAGCATCTGGAGAAAGGTTTCTATATTGAACCCACA 1125  
 LOC\_Os08g32870.1\_F ATTCTGACTGGTGGGGTTAGACCAAGCATCTGGAGAAAGGTTTCTATATTGAACCCACA 1134  
 LOC\_Os04g39020.1 ATTCTATATGGGGGTGCCCGACCACAACACCTCAAAGGGGGTTCTTTATTGAGCCTACT 1140  
 \* \* \* \* \*

LOC\_Os08g32870.1\_NF ATCATTACTGATGTCGATACATCAATGCAAATTTGGAGGGAAGAAGTTTTGGTCCAGTG 1185  
 LOC\_Os08g32870.1\_F ATCATTACTGATGTCGATACATCAATGCAAATTTGGAGGGAAGAAGTTTTGGTCCAGTG 1194  
 LOC\_Os04g39020.1 ATATAACAAATGTTAGCACATCAATGCAAATTTGGCGAGAGGAAGTCTTTGACCGGTC 1200  
 \* \* \* \* \*

LOC\_Os08g32870.1\_NF CTCTGTGTGAAAGAATTTAGCACTGAAGAAGAAGCCATTGAATTTGGCCAACGATACTCAT 1245  
 LOC\_Os08g32870.1\_F CTCTGTGTGAAAGAATTTAGCACTGAAGAAGAAGCCATTGAATTTGGCCAACGATACTCAT 1254  
 LOC\_Os04g39020.1 ATCTGCGTTAAAGAATTTAGGACAGAGCGTGAAGCAGTAGAACTTGCAAAATGATACTCAC 1260  
 \* \* \* \* \*

LOC\_Os08g32870.1\_NF TATGGTCTGGCTGGTGTGTGCTTTCCGGTGACCGCGAGCGATGCCAGAGATTAACCTGAG 1305  
 LOC\_Os08g32870.1\_F TATGGTCTGGCTGGTGTGTGCTTTCCGGTGACCGCGAGCGATGCCAGAGATTAACCTGAG 1314  
 LOC\_Os04g39020.1 TATGGTCTAGCTGGCGCTGTGATTTCCAAATGATCTAGAGAGGTGCGAGCGCATTTCAAAG 1320  
 \* \* \* \* \*

LOC\_Os08g32870.1\_NF GAGATCGATGCCGGAATTATCTGGGTGAACTGCTCGCAACCCCTGCTTCTGCCAAGCTCCA 1365  
 LOC\_Os08g32870.1\_F GAGATCGATGCCGGAATTATCTGGGTGAACTGCTCGCAACCCCTGCTTCTGCCAAGCTCCA 1374  
 LOC\_Os04g39020.1 GCTATCCAGTCAGGTATCGTTTGGATAAATGCTCGCAACCATGCTTTGTTCAAGCTCCA 1380  
 \* \* \* \* \*

LOC\_Os08g32870.1\_NF TGGGGCGGGAACAAGCGCAGCGCTTTGGACGCGAGCTCGGAGAAGGGGGCATTGACAAC 1425  
 LOC\_Os08g32870.1\_F TGGGGCGGGAACAAGCGCAGCGCTTTGGACGCGAGCTCGGAGAAGGGGGCATTGACAAC 1434  
 LOC\_Os04g39020.1 TGGGGAGGGAACAAGCGGAGTGGTTTTGGCCGGGAGCTAGGACAGTGGGGCCTCGATAAC 1440  
 \* \* \* \* \*

LOC\_Os08g32870.1\_NF TACCTAAGCGTCAAGCAAGTACGCGAGTACGCCTCCGATGAGCCGTGGGGATGGTACAAA 1485  
 LOC\_Os08g32870.1\_F TACCTAAGCGTCAAGCAAGTACGCGAGTACGCCTCCGATGAGCCGTGGGGATGGTACAAA 1494  
 LOC\_Os04g39020.1 TACTTGAGCGTGAAGCAAGTACCAAGTACTGCTCAGATGAACCATACGGATGGTACCGG 1500  
 \* \* \* \* \*

LOC\_Os08g32870.1\_NF TCCCTTCCAAGCTGTAA 1503  
 LOC\_Os08g32870.1\_F TCCCTTCCAAGCTGTAA 1512  
 LOC\_Os04g39020.1 CCTCATCCAAGCTGTAG 1518  
 \* \* \* \* \*
